# Supplementary material
Source: MDPI journal article supplement (https://www.mdpi.com/1999-4907/9/10/609)
Supplement: s1 [file s1]

301 Moved Permanently


# 301 Moved Permanently


---

cloudflare
