# Supplementary material
Source: MDPI journal article supplement (https://www.mdpi.com/1999-4907/9/10/609)
Supplement: s1 [file s1]

Table S1. A comprehensive list of all trifecta jurisdictions identified in this analysis.

| Jurisdiction | Commodities | REDD+ Programs         | Geographies of Interest       | Jurisdictional Approaches                                                                                                                                                                                                                                                                                                                                                                                                                                                                                                                                                                                                                                                                                                                                                                                                                                                                                                                                                                                                                                                                                                                                                                                                                   | Private Sector Commitments                                                                                                                                                                                                                                                                                                                                                                                                                                                                                                                                                                                                                                                                                                                                                                                                                                                                                                                                                                                                                                                                                                                                                                                                                                                                                                            |
|--------------|-------------|------------------------|-------------------------------|---------------------------------------------------------------------------------------------------------------------------------------------------------------------------------------------------------------------------------------------------------------------------------------------------------------------------------------------------------------------------------------------------------------------------------------------------------------------------------------------------------------------------------------------------------------------------------------------------------------------------------------------------------------------------------------------------------------------------------------------------------------------------------------------------------------------------------------------------------------------------------------------------------------------------------------------------------------------------------------------------------------------------------------------------------------------------------------------------------------------------------------------------------------------------------------------------------------------------------------------|---------------------------------------------------------------------------------------------------------------------------------------------------------------------------------------------------------------------------------------------------------------------------------------------------------------------------------------------------------------------------------------------------------------------------------------------------------------------------------------------------------------------------------------------------------------------------------------------------------------------------------------------------------------------------------------------------------------------------------------------------------------------------------------------------------------------------------------------------------------------------------------------------------------------------------------------------------------------------------------------------------------------------------------------------------------------------------------------------------------------------------------------------------------------------------------------------------------------------------------------------------------------------------------------------------------------------------------|
| Brazil       | Cattle, soy | National (UNFCCC FREL) | Amazon biome<br>Cerrado biome | <p><b>Produce, Conserve, Include:</b> state government-led strategy that aims to reconcile a sustainable low carbon economy with environmental conservation and social productive inclusion, contributing to climate change mitigation and adaptation.</p> <p><b>Novo Campo:</b> multistakeholder initiative started by Instituto Centro de Vida (ICV) that aims to promote sustainable cattle ranching in Alta Floresta, Mato Grosso. ICV partners with Embrapa (the Brazilian Agricultural Research Cooperation, a subsidiary of Brazil's Ministry of Agriculture), rural unions from Alta Floresta and Cotriguacu, private companies, and NGOs.</p> <p><b>Sustainable Tropics Alliance, Acre:</b> strategic partnership to develop and share low-emissions rural development models by implementing low-emission rural development; System of Incentives for Environmental Services (SISA) provides the backbone for a jurisdictional plan.</p> <p><b>Sustainable Tropics Alliance Pará:</b> strategic partnership to develop and share low-emissions rural development models by implementing low-emission rural development; in Pará, Green Municipalities Program provides the framework for jurisdictional work; led to regional</p> | <p><b>Cargill:</b> has been working with partners to reduce deforestation and ensure sustainable soy production in the Amazon.</p> <p><b>Cofco:</b> working to ensure that 100% soy from Brazil's Amazon and Cerrado is sustainable.</p> <p><b>Minerva SA:</b> 100% of cattle products sourced from direct suppliers operating in Amazon biome will be deforestation free by 2017; Cattle Agreements signatory.</p> <p><b>Marfrig:</b> excludes supplier farms who deforested in Amazon after Oct. 2009; established "Minimum Criteria for Industrial Scale Cattle Operations in the Brazilian Amazon Biome;" 100% of soy from Brazil will come from suppliers compliant with IBAMA and MTE embargoes by 2015; Cattle Agreements signatory.</p> <p><b>McDonald's:</b> working with Brazilian Roundtable on Sustainable Livestock, NGO, and industry partners to eliminate deforestation in Amazon biome; purchases portion of verified sustainable beef from Novo Campo program; supported indefinite extension of Soy Moratorium.</p> <p><b>M&amp;S:</b> signed Soy Moratorium to ensure soy is sourced from areas that don't contribute to deforestation.</p> <p><b>Walmart:</b> established Soybean Pact and Livestock Pact to remove illegal deforestation from supply chains; participated in São Félix do Xingu initiative.</p> |

| Jurisdiction        | Commodities | REDD+ Programs | Geographies of Interest                               | Jurisdictional Approaches                                                                                                                                                                                                                                                                                                                                                                                                                                                                                                                                                                                                                                                                                                                                                                                                                                                                                                                                                                                                   | Private Sector Commitments                                                                                                                                                                                                                                                                                                                                                                                                                                                                                                                                                                                                                                                                                                                                                                                                                                                                                                                                                                                                                                                                                                                                                                                                                                             |
|---------------------|-------------|----------------|-------------------------------------------------------|-----------------------------------------------------------------------------------------------------------------------------------------------------------------------------------------------------------------------------------------------------------------------------------------------------------------------------------------------------------------------------------------------------------------------------------------------------------------------------------------------------------------------------------------------------------------------------------------------------------------------------------------------------------------------------------------------------------------------------------------------------------------------------------------------------------------------------------------------------------------------------------------------------------------------------------------------------------------------------------------------------------------------------|------------------------------------------------------------------------------------------------------------------------------------------------------------------------------------------------------------------------------------------------------------------------------------------------------------------------------------------------------------------------------------------------------------------------------------------------------------------------------------------------------------------------------------------------------------------------------------------------------------------------------------------------------------------------------------------------------------------------------------------------------------------------------------------------------------------------------------------------------------------------------------------------------------------------------------------------------------------------------------------------------------------------------------------------------------------------------------------------------------------------------------------------------------------------------------------------------------------------------------------------------------------------|
| Brazil <i>Cont.</i> |             |                | <p>Amazon biome</p> <p>Cerrado biome <i>Cont.</i></p> | <p>Conference, "Fisheries Development on the Lower Amazon Floodplain;" resulted in the "Letter from Santarém in Defense of Lower Amazon Artisanal Fisheries," and agreements with government institutions to reverse recent policy decisions, resolve floodplain land tenure issues, and support effective partnerships for the co-management of Lower Amazon fisheries; resulted in initial phase of multi-stakeholder process to negotiate a Lower Amazon Pact for Sustainable Fisheries and construction of a regional plan to achieve objectives and targets defined in this Pact through the participatory management of floodplain aquatic and terrestrial resources.</p> <p><b>São Félix do Xingu:</b> national and state government policies and enforcement that discourage high levels of deforestation; creates positive incentives, such as intensified cattle ranching, expansion of high-value crops such as cocoa for settlement communities, and green development planning for indigenous communities.</p> | <p><b>ADM:</b> completed an assessment of ADM's palm oil plantation in Pará, where it is pursuing RSPO certification.</p> <p><b>Bunge:</b> working with The Nature Conservancy to get soy suppliers in target soy municipalities up to full compliance with Forest Code and identify early signs of soy expansion around new facilities in the Amazon.</p> <p><b>Carrefour:</b> aiming to achieve 100% monitored beef in Brazil by using satellite surveillance; in 2014, began encouraging suppliers to track beef supply; supports Soy Moratorium.</p> <p><b>JBS:</b> implementing "Minimum Criteria for Industrial Scale Cattle Operations in the Brazilian Amazon Biome;" Cattle Agreements signatory; participant of Novo Campo program.</p> <p><b>Mars:</b> committed to sourcing 100% of Brazilian beef and soy from suppliers in compliance with the Forest Code; has worked closely with suppliers who have more direct visibility into beef sources; only sources third-party certified soy.</p> <p><b>Louis Dreyfus:</b> announced deforestation-free soy policy; working to develop logistics system in Pará state; investing in due diligence.</p> <p><b>Amaggi:</b> partner of the PCI; developed strategic forest restoration plan for Mato Grosso.</p> |

| Jurisdiction  | Commodities                  | REDD+ Programs                                                                             | Geographies of Interest            | Jurisdictional Approaches                                                                                                                                                                                                                                                                                                                                                                                                                                                                                                                                                                                                                                                                                                                                                                                                                 | Private Sector Commitments                                                                                                                                                                                                                                                                          |
|---------------|------------------------------|--------------------------------------------------------------------------------------------|------------------------------------|-------------------------------------------------------------------------------------------------------------------------------------------------------------------------------------------------------------------------------------------------------------------------------------------------------------------------------------------------------------------------------------------------------------------------------------------------------------------------------------------------------------------------------------------------------------------------------------------------------------------------------------------------------------------------------------------------------------------------------------------------------------------------------------------------------------------------------------------|-----------------------------------------------------------------------------------------------------------------------------------------------------------------------------------------------------------------------------------------------------------------------------------------------------|
| Colombia      | Cattle, soy, palm oil, cocoa | National (UN-REDD, FCPF, UNFCCC FREL)<br><br>Subnational (REM agreement for Amazon region) | Orinoquia                          | <b>BioCF-ISFL, Orinoquia:</b> focuses on promoting a conducive business environment for sustainable agriculture practices and production systems by strengthening institutional capacities—at the national, regional and local levels—to plan, implement, and monitor integrated landscape management.                                                                                                                                                                                                                                                                                                                                                                                                                                                                                                                                    | <b>Nutresa:</b> committed to responsible cocoa sourcing.<br><br><b>ADM:</b> 100% deforestation free palm oil; no deforestation of HCS forests or HCV areas; no development of peatlands; committed to No Deforestation and No Exploitation in soy and palm oil supply chains in all sourcing areas. |
|               |                              |                                                                                            | National                           | <b>Sustainable Tropics Alliance, Colombia:</b> strategic partnership to develop and share low-emissions rural development models by supporting the development of strategies aimed at reducing deforestation by promoting private sector involvement and increasing governance capacities; maps initiatives that are promoting rural development and sustainable production systems; provided analysis of opportunities for promoting sustainable commodities supply chains while reducing rates of deforestation; identifies potential incentives, policies and financial mechanisms that could be applied to promote low-carbon development strategies; develops proposals for relevant supply chain interventions and governance approaches that could contribute to national strategies and plans, such as the Amazon Vision Program. | <b>Arcos Dorados:</b> 100% of palm oil will be RSPO certified by 2020 from all sourcing areas.<br><br><b>Marfrig:</b> formed a partnership with TFA 2020 to reduce deforestation associated with beef and palm oil, among other commodities.                                                        |
| Côte d'Ivoire | Palm oil, cocoa, timber      | National (UN-REDD, FCPF, UNFCCC FREL)                                                      | Southwest Region<br><br>Tai Region | <b>FCPF ERP, Ivory Coast:</b> aims to address the main drivers of deforestation including extension of agricultural production areas, weak forest governance and illegal logging,                                                                                                                                                                                                                                                                                                                                                                                                                                                                                                                                                                                                                                                         | <b>Olam:</b> as a FCPF ERP partner, aims to help address the main drivers of deforestation through zero-deforestation agriculture in partnership with the private sector, agricultural intensification, and capacity                                                                                |

| Jurisdiction               | Commodities | REDD+ Programs | Geographies of Interest                         | Jurisdictional Approaches                                                                                                                                                                                                                                                                                                                                                                                                                                                                                                                                                                                                                                                                                                                                                                                                 | Private Sector Commitments                                                                                                                                                                                                                                                                                                                                                                                                                                                                                                          |
|----------------------------|-------------|----------------|-------------------------------------------------|---------------------------------------------------------------------------------------------------------------------------------------------------------------------------------------------------------------------------------------------------------------------------------------------------------------------------------------------------------------------------------------------------------------------------------------------------------------------------------------------------------------------------------------------------------------------------------------------------------------------------------------------------------------------------------------------------------------------------------------------------------------------------------------------------------------------------|-------------------------------------------------------------------------------------------------------------------------------------------------------------------------------------------------------------------------------------------------------------------------------------------------------------------------------------------------------------------------------------------------------------------------------------------------------------------------------------------------------------------------------------|
| Côte d'Ivoire <i>Cont.</i> |             |                | Southwest Region<br><br>Tai Region <i>Cont.</i> | logging for wood energy production, illegal mining through zero-deforestation agriculture in partnership with the private sector, agricultural intensification, and capacity building for forest monitoring, among other activities.                                                                                                                                                                                                                                                                                                                                                                                                                                                                                                                                                                                      | building for forest monitoring, among other activities; through Cocoa & Forests Initiative is committing to working together, in partnership with other organizations, to end deforestation and forest degradation in the cocoa supply chain.<br><br><b>Cargill:</b> as a FCPF ERP partner aims to help address the main drivers of deforestation through zero-deforestation agriculture in partnership with the private sector, agricultural intensification, and capacity building for forest monitoring, among other activities. |
|                            |             |                | National                                        | <p><b>TFA 2020 Africa Palm Oil Initiative:</b> engages 10 West and Central African Countries, leading palm oil consumers, trading and producing companies, civil society, and indigenous and local peoples groups; led to Marrakesh Declaration-- regional pledge by seven African governments to shift towards sustainable palm production; in Côte d'Ivoire is led by Solidaridad, AIPH (the national oil palm association) and the REDD+ Secretariat; the country team is planning how to implement the national principles agreed in 2016 as well as how to follow up on opportunities presented at the Implementation Dialogue held in March 2017.</p> <p><b>World Cocoa Foundation's Forest and Climate Initiative:</b> includes plans to introduce a differentiated approach for improved management of forest</p> | <b>ADM:</b> 100% deforestation free palm oil; no deforestation of HCS forests or HCV areas; no development of peatlands; committed to No Deforestation and No Exploitation in soy and palm oil supply chains in all sourcing areas.                                                                                                                                                                                                                                                                                                 |

| Jurisdiction                     | Commodities                     | REDD+ Programs               | Geographies of Interest | Jurisdictional Approaches                                                                                                                                                                                                                                                                                                                                                                                                                                                                                                                                              | Private Sector Commitments                                                                                                                                                                    |
|----------------------------------|---------------------------------|------------------------------|-------------------------|------------------------------------------------------------------------------------------------------------------------------------------------------------------------------------------------------------------------------------------------------------------------------------------------------------------------------------------------------------------------------------------------------------------------------------------------------------------------------------------------------------------------------------------------------------------------|-----------------------------------------------------------------------------------------------------------------------------------------------------------------------------------------------|
| Côte d'Ivoire <i>Cont.</i>       |                                 |                              | National <i>Cont.</i>   | reserves, based on the level of degradation of the forests; up-to-date maps on forest cover and land-use, as well as socio-economic data on cocoa farmers and their communities will be developed and publicly shared by the governments; chocolate and cocoa industry agree to put in place verifiable monitoring systems for traceability from farm to the first purchase point for their own purchases of cocoa, and will work with the government of Côte d'Ivoire to ensure an effective national framework for traceability for all traders in the supply chain. |                                                                                                                                                                                               |
| Democratic Republic of the Congo | Palm oil, cocoa, cattle, timber | National (FCPF, UNFCCC FREL) | Mai Ndombe              | <b>FCPF ERP, Mai Ndombe Province:</b> aims to engage timber forest concessionaires to incentivize improved forest management practices, create land management plans for over a thousand communities, increase forest plantations to meet timber and fuel needs, and implement agroforestry practices and fire management.                                                                                                                                                                                                                                             | <b>SOGENAC:</b> cattle ranching company involved in Mai Ndombe project.<br><br><b>Federation of Wood Industries (FIB):</b> network of timber companies in DRC and Mai Ndombe project partner. |
|                                  |                                 |                              | National                | <b>TFA 2020 Africa Palm Oil Initiative:</b> engages 10 West and Central African Countries, leading palm oil consumers, trading and producing companies, civil society, and indigenous and local peoples groups; led to Marrakesh Declaration.                                                                                                                                                                                                                                                                                                                          | <b>Olam:</b> TFA 2020 Africa Palm Oil partner aiming toward sustainable palm oil production supply chain.<br><br><b>FERONIA:</b> Country's palm oil company committed to deforestation-free.  |

| Jurisdiction       | Commodities     | REDD+ Programs               | Geographies of Interest       | Jurisdictional Approaches                                                                                                                                                                                                                                                                                                                                                                                                                                                                                                          | Private Sector Commitments                                                                                                                                                                                                                                                                                                                                                                                                                |
|--------------------|-----------------|------------------------------|-------------------------------|------------------------------------------------------------------------------------------------------------------------------------------------------------------------------------------------------------------------------------------------------------------------------------------------------------------------------------------------------------------------------------------------------------------------------------------------------------------------------------------------------------------------------------|-------------------------------------------------------------------------------------------------------------------------------------------------------------------------------------------------------------------------------------------------------------------------------------------------------------------------------------------------------------------------------------------------------------------------------------------|
| Dominican Republic | Cocoa           | National (FCPF)              | National                      | <b>Green Commodities Program, Dominican Republic:</b> program to develop national cacao platform which will produce cacao in a sustainable manner; in 2013, the Government of the Dominican Republic started working with the Green Commodities Program to address some of these key sustainability issues in the cocoa sector; led to establishment of the National Cocoa Platform.                                                                                                                                               | <b>Mondelez:</b> through Cocoa life, committed to source all cocoa sustainably; established National Cocoa Platform in the Dominican Republic as part of the Green Commodities Program.                                                                                                                                                                                                                                                   |
| Gabon              | Palm oil        | National (UN-REDD, FCPF)     | National                      | <b>TFA 2020 Africa Palm Oil Initiative:</b> engages 10 West and Central African Countries, leading palm oil consumers, trading and producing companies, civil society, and indigenous and local peoples groups; led to Marrakesh Declaration.                                                                                                                                                                                                                                                                                      | <b>Olam:</b> 100% RSPO-certified Palm Oil plantations by 2021 for Olam Palm Gabon; 100% RSPO-certified palm for GRAINE outgrower program by 2020 under the public-private partnership with JV "Sotrader" and the Republic of Gabon.                                                                                                                                                                                                       |
| Ghana              | Palm oil, cocoa | National (FCPF, UNFCCC FREL) | Brong-Ahafo<br>Western Region | <b>High Forest Zone Eco-Region (Cocoa Forest Mosaic Landscape):</b> program seeks to significantly reduce emissions across the High Forest Zone (HFZ) that are driven by cocoa farming and other key drivers in a manner that will secure the future of Ghana's forests, significantly improve livelihoods opportunities for farmers and forest users, and establish a results-based planning and implementation framework through which the government, the private sector, civil society, and local communities can collaborate. | <b>Olam:</b> Rainforest Alliance-Olam Partnership for Livelihoods & Landscapes in Western Ghana partner; aims for 100% of cocoa volumes to be traceable and sustainable by 2020 to end deforestation and forest degradation in cocoa supply chains; through Cocoa & Forests Initiative is committing to working together, in partnership with other organizations, to end deforestation and forest degradation in the cocoa supply chain. |
|                    |                 |                              | National                      | <b>TFA 2020 Africa Palm Oil Initiative:</b> engages 10 West and Central African Countries, leading palm oil consumers, trading and producing companies, civil society, and                                                                                                                                                                                                                                                                                                                                                         | <b>Cargill:</b> in 2012 launched Cocoa Promise to source more sustainable cocoa.<br><br><b>Wilmar:</b> 100% of palm oil will be deforestation free by 2015; no deforestation of                                                                                                                                                                                                                                                           |

| Jurisdiction       | Commodities     | REDD+ Programs                        | Geographies of Interest | Jurisdictional Approaches                                                                                                                                                                                                                                                                                                                                                                                                                                                                                                                                                                                                                                                                                                                                                                                                                                                                                                                                                                                                                                                                                                         | Private Sector Commitments                                                                                                                                                                                                                                                                           |
|--------------------|-----------------|---------------------------------------|-------------------------|-----------------------------------------------------------------------------------------------------------------------------------------------------------------------------------------------------------------------------------------------------------------------------------------------------------------------------------------------------------------------------------------------------------------------------------------------------------------------------------------------------------------------------------------------------------------------------------------------------------------------------------------------------------------------------------------------------------------------------------------------------------------------------------------------------------------------------------------------------------------------------------------------------------------------------------------------------------------------------------------------------------------------------------------------------------------------------------------------------------------------------------|------------------------------------------------------------------------------------------------------------------------------------------------------------------------------------------------------------------------------------------------------------------------------------------------------|
| Ghana <i>Cont.</i> |                 |                                       | National <i>Cont.</i>   | <p>indigenous and local peoples groups; led to Marrakesh Declaration; in Ghana, the APOI team has contributed to a bill on responsible oil palm production, presented to the Minister of Agriculture; the team is also exploring potential partnerships, particularly regarding the elements of the action plan relating to smallholders and those enabled thanks to the Implementation Dialogue held in March 2017.</p> <p><b>World Cocoa Foundation's Forest and Climate Initiative:</b> plans to introduce a differentiated approach for improved management of forest reserves, based on the level of degradation of the forests; up-to-date maps on forest cover and land-use, as well as socio-economic data on cocoa farmers and their communities will be developed and publicly shared by governments; chocolate and cocoa industry agree to put in place verifiable monitoring systems for traceability from farm to the first purchase point for their own purchases of cocoa; will work with the government of Ghana to ensure effective national framework for traceability for all traders in the supply chain.</p> | <p>HCS forests or HCV areas wherever palm is sourced.</p> <p><b>ADM:</b> 100% deforestation free palm oil; no deforestation of HCS forests or HCV areas; no development of peatlands; committed to No Deforestation and No Exploitation in soy and palm oil supply chains in all sourcing areas.</p> |
| Indonesia          | Palm oil, cocoa | National (UN-REDD, FCPF, UNFCCC FREL) | Sumatra                 | <b>INPOP:</b> national commodity platform in which the Ministry of Agriculture and partners agreed to coordinate entire palm oil sector and existing initiatives focused on sustainability of                                                                                                                                                                                                                                                                                                                                                                                                                                                                                                                                                                                                                                                                                                                                                                                                                                                                                                                                     | <b>Cargill:</b> involved with RSPO J-pilot; collaborates closely with over 21,000 smallholders in Indonesia to achieve RSPO standards, improve crop quality, maximize yields and build up their brands locally and                                                                                   |

| Jurisdiction           | Commodities | REDD+ Programs | Geographies of Interest | Jurisdictional Approaches                                                                                                                                                                                                                                                                                                                                                                                                                                                                                                                                                                                                                                                                                                                                                                                                                                                                                                                                                                                                                                                                                                        | Private Sector Commitments                                                                                                                                                                                                                                                                                                                                                                                                                                                                                                                                                                                                                                                                                                              |
|------------------------|-------------|----------------|-------------------------|----------------------------------------------------------------------------------------------------------------------------------------------------------------------------------------------------------------------------------------------------------------------------------------------------------------------------------------------------------------------------------------------------------------------------------------------------------------------------------------------------------------------------------------------------------------------------------------------------------------------------------------------------------------------------------------------------------------------------------------------------------------------------------------------------------------------------------------------------------------------------------------------------------------------------------------------------------------------------------------------------------------------------------------------------------------------------------------------------------------------------------|-----------------------------------------------------------------------------------------------------------------------------------------------------------------------------------------------------------------------------------------------------------------------------------------------------------------------------------------------------------------------------------------------------------------------------------------------------------------------------------------------------------------------------------------------------------------------------------------------------------------------------------------------------------------------------------------------------------------------------------------|
| Indonesia <i>Cont.</i> |             |                | Sumatra <i>Cont.</i>    | <p>palm oil; multistakeholder participants will agree on national plan which will define and enable wide-scale solutions.</p> <p><b>Unilever fractionation plant:</b> pilot program in North Sumatra to achieve RSPO certified independent smallholder farmers via fractionation plant that will require RSPO certified palm kernel oil from RSPO certified plantations and smallholders of Indonesian Palm Oil Development for Smallholders (IPODS); plan to train 100,000 independent farmers in the production of sustainable palm oil.</p> <p><b>RSPO J-Pilot, South Sumatra:</b> pilot jurisdictional RSPO program in Indonesia to ensure all palm oil produced will be certified sustainable; with IDH, Unilever is working to drive sustainable palm oil through the RSPO.</p> <p><b>ISFL Indonesia Program, Jambi Province:</b> will pilot a jurisdictional landscape approach to improve landscape management and reduce emissions from the forest and land use sector, while promoting alternative livelihoods that help take the pressure off the province's primary forests and peatlands in the Jambi Province.</p> | <p>internationally, while building a better livelihoods; as of January 2016, 24,461 hectares of Cargill's smallholder plantations have been RSPO certified; through a formal contract, Cargill shares premiums from certified sustainable palm oil with its smallholders.</p> <p><b>Mondelez:</b> involved in INPOP and working with participants to agree on a national plan that will define and enable wide-scale solutions for sustainable palm oil.</p> <p><b>Unilever:</b> established fractionation plant to produce sustainable palm oil; was among the first companies to publicly commit to a long-term goal to source 100% of palm oil sustainably and has been working with teams on the ground to make this a reality.</p> |
|                        |             |                | Kalimantan              | <p><b>INPOP:</b> national commodity platform in which the Ministry of Agriculture and partners agreed to coordinate entire palm oil sector and existing</p>                                                                                                                                                                                                                                                                                                                                                                                                                                                                                                                                                                                                                                                                                                                                                                                                                                                                                                                                                                      | <p><b>Wilmar:</b> 100% of palm oil will be deforestation free by 2015; protect and manage HCS, HCV, and peatlands in Central Kalimantan, West Kalimantan; Production</p>                                                                                                                                                                                                                                                                                                                                                                                                                                                                                                                                                                |



| Jurisdiction           | Commodities | REDD+ Programs | Geographies of Interest | Jurisdictional Approaches                                                                                                                                                                                                                                                                                                                                                                                                                                                                                                                                                                                                                                                                                                                                                                                                                                                                                                                                                                                                                                                                                                                                                                                                                                                         | Private Sector Commitments                                                                                                                                                                                                                                               |
|------------------------|-------------|----------------|-------------------------|-----------------------------------------------------------------------------------------------------------------------------------------------------------------------------------------------------------------------------------------------------------------------------------------------------------------------------------------------------------------------------------------------------------------------------------------------------------------------------------------------------------------------------------------------------------------------------------------------------------------------------------------------------------------------------------------------------------------------------------------------------------------------------------------------------------------------------------------------------------------------------------------------------------------------------------------------------------------------------------------------------------------------------------------------------------------------------------------------------------------------------------------------------------------------------------------------------------------------------------------------------------------------------------|--------------------------------------------------------------------------------------------------------------------------------------------------------------------------------------------------------------------------------------------------------------------------|
| Indonesia <i>Cont.</i> |             |                | Kalimantan <i>Cont.</i> | <p>initiatives focused on sustainability of palm oil; multistakeholder participants will agree on national plan which will define and enable wide-scale solutions.</p> <p><b>RSPO J-Pilot, Central Kalimantan:</b> pilot jurisdictional RSPO program in Indonesia to ensure all palm oil produced will be certified sustainable; discussing how to create jurisdictional-level certification methodology</p> <p><b>Sustainable Tropics Alliance, Central Kalimantan:</b> strategic partnership to develop and share low-emissions rural development models; intends to inform policy and design innovations that leads to the sustainable and equitable production of commodities and use of natural resources.</p> <p><b>Produce Protect Initiative:</b> in West Kalimantan, IDH aims to protect 120,000 hectares of high-conservation value forest, rehabilitate 10,000 hectares, and ensure sustainable production on 43,000 hectares.</p> <p><b>Territorial Performance System, Central Kalimantan:</b> TPS is based on an in-depth argument that proliferating strategies to reducing deforestation would be more effective if linked through integrated performance-based incentive systems connected through a shared metric of jurisdictional performance; focuses on</p> | <p>Steering Committee focused efforts to trace supplies of FFB to mills in Indonesia.</p> <p><b>Mondelez:</b> involved in INPOP and working with participants to agree on a national plan that will define and enable wide-scale solutions for sustainable palm oil.</p> |

| Jurisdiction           | Commodities | REDD+ Programs | Geographies of Interest | Jurisdictional Approaches                                                                                                                                                                                                                                                                                                                                                                                                                                                                                                                                                                                                                                                                                                     | Private Sector Commitments                                                                                                                                                                                                                                                                                                                                                            |
|------------------------|-------------|----------------|-------------------------|-------------------------------------------------------------------------------------------------------------------------------------------------------------------------------------------------------------------------------------------------------------------------------------------------------------------------------------------------------------------------------------------------------------------------------------------------------------------------------------------------------------------------------------------------------------------------------------------------------------------------------------------------------------------------------------------------------------------------------|---------------------------------------------------------------------------------------------------------------------------------------------------------------------------------------------------------------------------------------------------------------------------------------------------------------------------------------------------------------------------------------|
| Indonesia <i>Cont.</i> |             |                | Kalimantan <i>Cont.</i> | informing policy and design innovations that leads to the sustainable and equitable production of commodities and use of natural resources.                                                                                                                                                                                                                                                                                                                                                                                                                                                                                                                                                                                   |                                                                                                                                                                                                                                                                                                                                                                                       |
|                        |             |                | Riau                    | <p><b>INPOP:</b> national commodity platform in which the Ministry of Agriculture and partners agreed to coordinate entire palm oil sector and existing initiatives focused on sustainability of palm oil; multistakeholder participants will agree on national plan while will define and enable wide-scale solutions.</p> <p><b>Riau Landscape Approach:</b> provides sourcing for prospective smallholders to pursue RSPO certification.</p>                                                                                                                                                                                                                                                                               | <b>Mondelez:</b> involved in INPOP and working with participants to agree on a national plan that will define and enable wide-scale solutions for sustainable palm oil.                                                                                                                                                                                                               |
|                        |             |                | West Papua              | <p><b>Sustainable Tropics Alliance, Indonesia West Papua:</b> strategic partnership to develop and share low-emissions rural development models; supports the development of strategies aimed at reducing deforestation by promoting private sector involvement and increasing governance capacities; aims to inform policy and design innovation that leads to sustainable production of commodities and use of natural resources can become more sustainable and beneficial for the poor.</p> <p><b>Territorial Performance System, West Papua:</b> TPS is based on an in-depth argument that proliferating strategies to reducing deforestation would be more effective if linked through integrated performance-based</p> | <b>Pepsi:</b> in 2016, PepsiCo received palm oil via direct suppliers from four mills in Papua; through Sustainable Sourcing Program, Sustainable Source Goals, and engagement with suppliers, the company is implementing its Forestry Stewardship Policy, which includes a commitment to zero deforestation, and moving towards traceability and certification of the supply chain. |

| Jurisdiction           | Commodities | REDD+ Programs                  | Geographies of Interest | Jurisdictional Approaches                                                                                                                                                                                                                                                                                                                                                                                                                                                                                                                                                                   | Private Sector Commitments                                       |
|------------------------|-------------|---------------------------------|-------------------------|---------------------------------------------------------------------------------------------------------------------------------------------------------------------------------------------------------------------------------------------------------------------------------------------------------------------------------------------------------------------------------------------------------------------------------------------------------------------------------------------------------------------------------------------------------------------------------------------|------------------------------------------------------------------|
| Indonesia <i>Cont.</i> |             |                                 | West Papua <i>Cont.</i> | <p>incentive systems connected through a shared metric of jurisdictional performance; focuses on informing policy and design innovations that leads to the sustainable and equitable production of commodities and use of natural resources.</p> <p><b>Spatial Planning and Green Growth:</b> jurisdictional land-use management system aims to define, monitor, and encourage sustainable rural development in the entire West Papua province; will contribute to the government of Papua's vision and spatial plan that intends to preserve 90 per cent forest cover in the province.</p> |                                                                  |
|                        |             |                                 | National                | <p><b>TFA 2020 Southeast Asia Initiative:</b> aims to support Southeast Asian partners, businesses, NGOs, and governments to build upon efforts underway in the region to eliminate deforestation from key commodities' supply chains by 2020.</p> <p><b>UNDP Green Commodities:</b> program supports national Government to set-up the Indonesia Sustainable Palm Oil Platform (FoKSBI); aims to boost farmers' competitiveness by exposing them to good agriculture practices as well as addressing gaps in policies which is key to the sustainability of the palm oil sector.</p>       |                                                                  |
| Malaysia               | Palm oil    | National (UN-REDD, UNFCCC FREL) | Sabah                   | <p><b>TFA 2020 Southeast Asia Initiative:</b> aims to support Southeast Asian partners, businesses, NGOs, and governments to build upon efforts</p>                                                                                                                                                                                                                                                                                                                                                                                                                                         | <p><b>Nestle:</b> 100% responsibly sourced palm oil by 2020.</p> |

| Jurisdiction          | Commodities | REDD+ Programs                   | Geographies of Interest | Jurisdictional Approaches                                                                                                                                                                                                                                                                                                                                                                                                                                                                                                                                                                                                                                                                                                                                     | Private Sector Commitments                                                                                                                                                                                                                                                                                                                                                                                                                                                                                                                                                                                                                                                                                                        |
|-----------------------|-------------|----------------------------------|-------------------------|---------------------------------------------------------------------------------------------------------------------------------------------------------------------------------------------------------------------------------------------------------------------------------------------------------------------------------------------------------------------------------------------------------------------------------------------------------------------------------------------------------------------------------------------------------------------------------------------------------------------------------------------------------------------------------------------------------------------------------------------------------------|-----------------------------------------------------------------------------------------------------------------------------------------------------------------------------------------------------------------------------------------------------------------------------------------------------------------------------------------------------------------------------------------------------------------------------------------------------------------------------------------------------------------------------------------------------------------------------------------------------------------------------------------------------------------------------------------------------------------------------------|
| Malaysia <i>Cont.</i> |             |                                  | Sabah <i>Cont.</i>      | <p>underway in the region to eliminate deforestation from key commodities' supply chains by 2020.</p> <p><b>RSPO J-pilot Sabah:</b> jurisdictional approach for sustainable palm oil; aims to ensure that all palm oil produced and processed in Sabah is conducted in a sustainable matter that meets RSPO certification standards.</p>                                                                                                                                                                                                                                                                                                                                                                                                                      | <p><b>Mondelez:</b> TFA 2020 Southeast Asia Initiative partner.</p> <p><b>McDonald's:</b> TFA 2020 Southeast Asia Initiative partner.</p> <p><b>Unilever:</b> TFA 2020 Southeast Asia Initiative partner M&amp;S: TFA 2020 Southeast Asia Initiative partner.</p> <p><b>Wilmar:</b> no HCS or HCV deforestation; member of RSPO's Sabah Jurisdictional Approach for Sustainable Palm Oil; Production Steering Committee Focused on efforts to trace supplies of FFB to own mills in Malaysia.</p>                                                                                                                                                                                                                                 |
| Mato Grosso, Brazil   | Soy, cattle | Subnational (REM in Mato Grosso) | Mato Grosso             | <p><b>Produce, Conserve, Include:</b> state government-led strategy that aims to reconcile a sustainable low carbon economy with environmental conservation and social productive inclusion, contributing to climate change mitigation and adaptation.</p> <p><b>Novo Campo:</b> multistakeholder initiative started by ICV that aims to promote sustainable cattle ranching in Alta Floresta, Mato Grosso. ICV partners with Embrapa, rural unions from Alta Floresta and Cotriguaçu, private companies, and NGOs.</p> <p><b>Sustainable Tropics Alliance, Mato Grosso:</b> strategic partnership to develop and share low-emissions rural development; in Mato Grosso has resulted in public-private partnership and 2 green funds being finalized, the</p> | <p><b>Louis Dreyfus:</b> announced deforestation-free soy policy; working to develop logistics system in Pará state; investing in due diligence.</p> <p><b>Amaggi:</b> partner of the PCI; developed strategic forest restoration plan for Mato Grosso.</p> <p><b>Marfrig:</b> exclude supplier farms who deforested in Amazon after Oct. 2009; established "Minimum Criteria for Industrial Scale Cattle Operations in the Brazilian Amazon Biome;" 100% of soy from Brazil will come from suppliers compliant with IBAMA and MTE embargoes by 2015; Cattle Agreements signatory.</p> <p><b>JBS:</b> implementing "Minimum Criteria for Industrial Scale Cattle Operations in the Brazilian Amazon Biome;" Cattle Agreements</p> |

| Jurisdiction                        | Commodities | REDD+ Programs                  | Geographies of Interest  | Jurisdictional Approaches                                                                                                                                                                                                                                                         | Private Sector Commitments                                                                                                                                                                                                                                                                                                                                                                                                                                                                                                                                                                                                                                                                                                |
|-------------------------------------|-------------|---------------------------------|--------------------------|-----------------------------------------------------------------------------------------------------------------------------------------------------------------------------------------------------------------------------------------------------------------------------------|---------------------------------------------------------------------------------------------------------------------------------------------------------------------------------------------------------------------------------------------------------------------------------------------------------------------------------------------------------------------------------------------------------------------------------------------------------------------------------------------------------------------------------------------------------------------------------------------------------------------------------------------------------------------------------------------------------------------------|
| Mato Grosso, Brazil<br><i>Cont.</i> |             |                                 | Mato Grosso <i>Cont.</i> | development of a territorial performance system, the creation of the Mato Grosso Forest Pact, formalization of partnerships with farm sectors, the development of a state-wide indigenous peoples' consultation, and progress in securing federal support for finance mechanisms. | signatory; participant of Novo Campo program.                                                                                                                                                                                                                                                                                                                                                                                                                                                                                                                                                                                                                                                                             |
| Nigeria                             | Palm oil    | National (UN-REDD, UNFCCC FREL) | National                 | <b>TFA 2020 Africa Palm Oil Initiative:</b> engages 10 West and Central African Countries, leading palm oil consumers, trading and producing companies, civil society, and indigenous and local peoples groups; led to Marrakesh Declaration.                                     | <b>Olam:</b> TFA 2020 Africa Palm Oil initiative partner.<br><br><b>Wilmar:</b> no HCS or HCV destruction in Nigeria.                                                                                                                                                                                                                                                                                                                                                                                                                                                                                                                                                                                                     |
| Paraguay                            | Soy, cattle | National (UN-REDD, UNFCCC FREL) | Atlantic Forest Region   | <b>Green Commodities Program:</b> jurisdictional approach to develop national cattle and soy platforms which will produce cattle and soy in a sustainable manner in order to reduce deforestation and land degradation in the Atlantic Forest region.                             | <b>ADM:</b> Green Commodities Program partner helping avoid deforestation by promoting sustainable production practices through developing national cattle and soy platforms to produce cattle and soy in a sustainable manner.<br><br><b>Bunge:</b> Green Commodities Program partner helping avoid deforestation by promoting sustainable production practices through developing national cattle and soy platforms to produce cattle and soy in a sustainable manner.<br><br><b>Louis Dreyfus:</b> Green Commodities Program partner helping avoid deforestation by promoting sustainable production practices through developing national cattle and soy platforms to produce cattle and soy in a sustainable manner. |

| Jurisdiction          | Commodities     | REDD+ Programs               | Geographies of Interest                | Jurisdictional Approaches                                                                                                                                                                                                                                                                                                                                                                                                                   | Private Sector Commitments                                                                                                                                                                                                                                                                                                                                                                                                                                                                                                                                                                                                                                                                                                                        |
|-----------------------|-----------------|------------------------------|----------------------------------------|---------------------------------------------------------------------------------------------------------------------------------------------------------------------------------------------------------------------------------------------------------------------------------------------------------------------------------------------------------------------------------------------------------------------------------------------|---------------------------------------------------------------------------------------------------------------------------------------------------------------------------------------------------------------------------------------------------------------------------------------------------------------------------------------------------------------------------------------------------------------------------------------------------------------------------------------------------------------------------------------------------------------------------------------------------------------------------------------------------------------------------------------------------------------------------------------------------|
| Paraguay <i>Cont.</i> |                 |                              | Atlantic Forest Region<br><i>Cont.</i> |                                                                                                                                                                                                                                                                                                                                                                                                                                             | <p><b>Cargill:</b> Green Commodities Program partner helping avoid deforestation by promoting sustainable production practices through developing national cattle and soy platforms to produce cattle and soy in a sustainable manner; partners with more than 3,000 soy framers in the Atlantic Forest region; has been advancing sustainable soy program in Paraguay since 2012; in 2016 began implementation of Forest Action Plan in Paraguay to eliminate deforestation across all supply chains.</p> <p><b>JBS:</b> Green Commodities Program partner helping avoid deforestation by promoting sustainable production practices through developing national cattle and soy platforms to produce cattle and soy in a sustainable manner.</p> |
| Republic of Congo     | Palm oil, cocoa | National (FCPF, UNFCCC FREL) | National                               | <p><b>TFA 2020 Africa Palm Oil Initiative:</b> engages 10 West and Central African Countries, leading palm oil consumers, trading and producing companies, civil society, and indigenous and local peoples groups; led to Marrakesh Declaration.</p> <p><b>FCPF ERP, Republic of Congo:</b> ERP in Northern Congo proposed by the Republic of Congo is a collaborative public-private partnership with CIB-Olam to increase production.</p> | <p><b>Olam:</b> collaborating with government in public-private partnership to produce more sustainable cocoa under FCPF ERP.</p>                                                                                                                                                                                                                                                                                                                                                                                                                                                                                                                                                                                                                 |

**Table S2.** A comprehensive list of all bifecta jurisdictions identified in this analysis.

| Jurisdiction | Commodities             | REDD+ Programs                                       | Geographies of Interest | Jurisdictional Approaches                                                                                                                                                                                                                                                                                                                                                                                                                                                                                                                                                                                                                                                                                                                                                                                                                                                                         | Private Sector Commitments |
|--------------|-------------------------|------------------------------------------------------|-------------------------|---------------------------------------------------------------------------------------------------------------------------------------------------------------------------------------------------------------------------------------------------------------------------------------------------------------------------------------------------------------------------------------------------------------------------------------------------------------------------------------------------------------------------------------------------------------------------------------------------------------------------------------------------------------------------------------------------------------------------------------------------------------------------------------------------------------------------------------------------------------------------------------------------|----------------------------|
| Acre, Brazil | Cattle                  | Subnational (REM agreement in Acre)                  | Acre                    | Sustainable Tropics Alliance, Acre: strategic partnership to develop and share low-emissions rural development models by implementing low-emission rural development; System of Incentives for Environmental Services (SISA) provides the backbone for a jurisdictional plan.                                                                                                                                                                                                                                                                                                                                                                                                                                                                                                                                                                                                                     | NA                         |
| Ecuador      | Cattle, palm oil, cocoa | National (UN-REDD, UNFCCC FREL)<br><br>REM agreement | National                | <b>Priming Financial and Land-Use Planning Instruments to Reduce Emissions from Deforestation:</b> under this program, targeted investment will control agricultural expansion into forest areas, whilst agricultural and livestock production practices will be implemented to reduce deforestation; land-use zoning plans will be aligned with national climate change-related targets, and measures will be implemented to support restoration, conservation and sustainable production in vulnerable watersheds; the project will also ensure that financial instruments are aligned with the objectives of the action plan, by orienting public credit lines towards sustainable agricultural production practices, promoting tax incentives for REDD-supportive activities, and strengthening purchasing policies for deforestation-free commodities, their certification and traceability. | NA                         |
| Mexico       | Cattle, palm oil        | National (UN-REDD, FCPF, UNFCCC FREL)                | Chiapas                 | Sustainable Tropics Alliance, Mexico: strategic partnership to develop and share low-emissions rural development models; the strategy led by the Chiapas government is                                                                                                                                                                                                                                                                                                                                                                                                                                                                                                                                                                                                                                                                                                                            | NA                         |

| Jurisdiction        | Commodities             | REDD+ Programs                  | Geographies of Interest | Jurisdictional Approaches                                                                                                                                                                                                                                                                                                                                                                                                                                                                                                                                                                                                                                                                                                                                                 | Private Sector Commitments |
|---------------------|-------------------------|---------------------------------|-------------------------|---------------------------------------------------------------------------------------------------------------------------------------------------------------------------------------------------------------------------------------------------------------------------------------------------------------------------------------------------------------------------------------------------------------------------------------------------------------------------------------------------------------------------------------------------------------------------------------------------------------------------------------------------------------------------------------------------------------------------------------------------------------------------|----------------------------|
| Mexico <i>Cont.</i> |                         |                                 | Chiapas <i>Cont.</i>    | developing collaborative agreements with institutions, organizations of local producers, and agro-industrial companies.                                                                                                                                                                                                                                                                                                                                                                                                                                                                                                                                                                                                                                                   |                            |
| Nepal               | Cattle                  | National (FCPF, UNFCCC FREL)    | Terai Arc Landscape     | <b>FCPF ERP, Terai Arc Landscape:</b> collaborative forest management program to increase access to alternative energy sources, and enhance alternative livelihoods, thereby addressing underlying drivers of degradation; aims to transform more than 2 million hectares of landscape and reach a population of seven million people, 80 percent of which are forest dependent.                                                                                                                                                                                                                                                                                                                                                                                          |                            |
| Peru                | Cattle, palm oil, cocoa | National (UN-REDD, UNFCCC FREL) | Pachitea Basin          | <b>Sustainable Tropics Alliance:</b> strategic partnership to develop and share low-emissions rural development models; 5000+ ha of forest area are protected under agreements with key stakeholders; builds environmental governance; helps the Oxapampa Ashaninka Yanasha Biosphere Reserve continue advancing its planning tool and strengthening its governance structure to manage the whole Oxapampa province; two municipal commonwealths in Oxapampa and Puerto Inca provinces are formally created to strengthen landscape-wide planning and policy implementation in Pachitea basin; entails monitoring of deforestation, water resources and fisheries developed with the participation of local government, university, and indigenous and rural communities. | NA                         |



| Jurisdiction      | Commodities | REDD+ Programs                  | Geographies of Interest   | Jurisdictional Approaches                                                                                                                                                                                                                                                                                                                                                                                                                                                                                                                                                                                                                                                                                                                                      | Private Sector Commitments |
|-------------------|-------------|---------------------------------|---------------------------|----------------------------------------------------------------------------------------------------------------------------------------------------------------------------------------------------------------------------------------------------------------------------------------------------------------------------------------------------------------------------------------------------------------------------------------------------------------------------------------------------------------------------------------------------------------------------------------------------------------------------------------------------------------------------------------------------------------------------------------------------------------|----------------------------|
| Peru <i>Cont.</i> |             |                                 | San Martin<br><br>Ucayali | <b>FCPF ERP, Emission Reductions in the Peruvian Amazon:</b> focuses on coordinating and linking the efforts of the public, private, and international cooperation sectors related to forest conservation and to strengthen the capacity for sustainable forest management at the national, local, and community levels; integrated sustainable landscapes approach entails: strengthening enabling conditions to improve the control of forest land, developing innovative sustainable forestry management, agroforestry and silvopastoral business models, and strengthening of technical and management capacities of the regional authorities, local governments, indigenous communities, producers, civil society organizations, and the business sector. | NA                         |
|                   |             |                                 | National                  | <b>Green Commodities Program:</b> supports the development of national coffee and oil palm platforms which will produce sustainable coffee and oil palm; aims to identify the drivers of unsustainable practices through an extensive root cause analysis involving an assessment of the policies and institutional conditions that enable deforestation from palm oil production and an analysis of the public financial and economic incentives enabling palm production.                                                                                                                                                                                                                                                                                    | NA                         |
| Zambia            | Soy         | National (UN-REDD, UNFCCC FREL) | Eastern Valley            | <b>Biocarbon ISFL, Zambia Integrated Forest Landscape System:</b> landscape approach to emissions reductions that prioritizes private sector engagement;                                                                                                                                                                                                                                                                                                                                                                                                                                                                                                                                                                                                       | NA                         |

| Jurisdiction        | Commodities | REDD+ Programs | Geographies of Interest     | Jurisdictional Approaches                                                                                                                                                                                                                           | Private Sector Commitments |
|---------------------|-------------|----------------|-----------------------------|-----------------------------------------------------------------------------------------------------------------------------------------------------------------------------------------------------------------------------------------------------|----------------------------|
| <i>Zambia Cont.</i> |             |                | <i>Eastern Valley Cont.</i> | the goal of the program is to improve landscape management and increase environmental and economic benefits for targeted rural communities and to improve Zambia's capacity to respond promptly and effectively to an eligible crisis or emergency. |                            |
